# Supplementary material
Source: PubMed Central journal article supplement (PMC6532505)
Supplement: rspb20190174supp1.pdf [file rspb20190174supp1.pdf]

# Supplementary Information Appendix

## Rate dynamics of ectotherm responses to thermal stress

Aleksandra Kovacevic<sup>1</sup>, Guillaume Latombe<sup>2</sup> and Steven L. Chown<sup>1</sup>

Author affiliations:

<sup>1</sup>School of Biological Sciences, Monash University, Melbourne, Victoria 3800, Australia

<sup>2</sup>Department of Mathematical Sciences, Centre for Invasion Biology, Stellenbosch University, Stellenbosch, 7602, South Africa

Author for correspondence: Aleksandra Kovacevic, [aleksandra.kovacevic@monash.edu](mailto:aleksandra.kovacevic@monash.edu)

**Table S1.** Heat Tolerance - Thermal death time parameters according to Rezende *et al.* 2014

| Species                          | Class          | Life stage | Habitat     | $CT_{max}$ | $z$  | $r^2$ | Response  | Reference                             |
|----------------------------------|----------------|------------|-------------|------------|------|-------|-----------|---------------------------------------|
| <i>Acanthemblemaria hancocki</i> | Actinopterygii | adult      | aquatic     | 36.63      | 0.39 | 0.335 | Mixed     | Mora & Maya 2006                      |
| <i>Atta sexdens rubropulosa</i>  | Insecta        | adult      | terrestrial | 53.29      | 2.17 | 0.417 | Decrease  | Ribeiro et al. 2012                   |
| <i>Bathygobius soporator</i>     | Actinopterygii | adult      | aquatic     | 39.27      | 0.08 | 0.056 | No effect | Vinagre et al. 2014                   |
| <i>Ceratitis capitata</i>        | Insecta        | adult      | terrestrial | 42.05      | 0.36 | 0.801 | Increase  | Nyamunkondiwa & Terblanche 2010       |
| <i>Ceratitis rosa</i>            | Insecta        | adult      | terrestrial | 40.26      | 0.78 | 0.976 | Increase  | Nyamunkondiwa & Terblanche 2010       |
| <i>Clupea harengus</i>           | Actinopterygii | larvae     | aquatic     | 31.82      | 3.28 | 0.885 | Decrease  | Moyano et al. 2017                    |
| <i>Cydia pomonella</i>           | Insecta        | adult      | terrestrial | 38.41      | 2.30 | 0.808 | Increase  | Chidawanyika & Terblanche 2011        |
| <i>Cyrtobagous salviniae</i>     | Insecta        | adult      | aquatic     | 57.79      | 6.34 | 0.861 | Decrease  | Allen et al. 2012                     |
| <i>Deuteraphorura one</i>        | Collembola     | adult      | terrestrial | 43.35      | 3.35 | 0.852 | Decrease  | Allen et al. 2016                     |
| <i>Deuteraphorura two</i>        | Collembola     | adult      | terrestrial | 46.62      | 3.81 | 0.942 | Decrease  | Allen et al. 2016                     |
| <i>Dicentrarchus labrax</i>      | Actinopterygii | larvae     | aquatic     | 32.14      | 0.04 | 0.128 | No effect | Moyano et al. 2017                    |
| <i>Drosophila melanogaster</i>   | Insecta        | adult      | terrestrial | 42.67      | 1.75 | 0.984 | Decrease  | Chown et al. 2009                     |
| <i>Drosophila subobscura</i>     | Insecta        | adult      | terrestrial | 42.17      | 3.13 | na    | Decrease  | Castañeda et al 2015                  |
| <i>Eurypanopeus abbreviatus</i>  | Malacostraca   | adult      | aquatic     | 37.42      | 0.81 | 1.000 | Increase  | Vinagre et al. 2014                   |
| <i>Exosphaeroma antikraussi</i>  | Malacostraca   | adult      | aquatic     | 40.60      | 1.32 | na    | No effect | Faulkner et al. 2014                  |
| <i>Exosphaeroma gigas</i>        | Malacostraca   | adult      | aquatic     | 34.95      | 2.12 | 0.819 | Decrease  | Faulkner et al. 2014                  |
| <i>Exosphaeroma laeviusculum</i> | Malacostraca   | adult      | aquatic     | 49.26      | 5.04 | 0.802 | Decrease  | Faulkner et al. 2014                  |
| <i>Folsomia candida</i>          | Collembola     | adult      | terrestrial | 45.37      | 3.49 | 0.852 | Decrease  | Allen et al. 2016                     |
| <i>Glossina pallidipes</i>       | Insecta        | adult      | terrestrial | 56.41      | 7.49 | 0.716 | Decrease  | Terblanche et al. 2007, 2008          |
| <i>Hippolyte obliquimanus</i>    | Malacostraca   | adult      | aquatic     | 34.66      | 0.06 | 0.980 | No effect | Vinagre et al. 2014                   |
| <i>Hyale grandicornis</i>        | Malacostraca   | adult      | aquatic     | 52.68      | 8.58 | 0.976 | Decrease  | Faulkner et al. 2014                  |
| <i>Hyale hirtipalma</i>          | Malacostraca   | adult      | aquatic     | 34.90      | 3.05 | 0.977 | Decrease  | Faulkner et al. 2014                  |
| <i>Hypogastrura assimilis</i>    | Collembola     | adult      | terrestrial | 51.75      | 3.81 | 0.942 | Decrease  | Allen et al. 2016                     |
| <i>Hypogastrura viatica</i>      | Collembola     | adult      | terrestrial | 52.10      | 5.20 | 0.993 | Decrease  | Allen et al. 2016                     |
| <i>Lepomis gibbosus</i>          | Actinopterygii | juvenile   | aquatic     | 36.25      | 0.43 | 0.216 | Decrease  | Becker & Genoway 1979                 |
| <i>Linepithema humile</i>        | Insecta        | adult      | terrestrial | 54.58      | 5.90 | 0.981 | Decrease  | Jumbam et al. 2008; Chown et al. 2009 |
| <i>Menippe nodifrons</i>         | Malacostraca   | adult      | aquatic     | 38.71      | 0.32 | 0.629 | Increase  | Vinagre et al. 2014                   |

|                                 |                |          |             |       |      |       |           |                                               |
|---------------------------------|----------------|----------|-------------|-------|------|-------|-----------|-----------------------------------------------|
| <i>Nylanderia fulva</i>         | Insecta        | adult    | terrestrial | 56.04 | 7.82 | 1.000 | Decrease  | Bentley et al. 2016                           |
| <i>Oncorhynchus kitsutch</i>    | Actinopterygii | juvenile | aquatic     | 30.75 | 1.13 | 0.939 | Decrease  | Becker & Genoway 1979                         |
| <i>Oncorhynchus mykiss</i>      | Actinopterygii | juvenile | aquatic     | 27.84 | 0.24 | 0.478 | No effect | Galbreath et al. 2004                         |
| <i>Palaemon northropi</i>       | Malacostraca   | adult    | aquatic     | 40.10 | 0.33 | 0.363 | Decrease  | Vinagre et al. 2014                           |
| <i>Parablennius marmoreus</i>   | Actinopterygii | adult    | aquatic     | 37.10 | 0.56 | 0.997 | Decrease  | Vinagre et al. 2014                           |
| <i>Pycnopsyche guttifer</i>     | Insecta        | larvae   | aquatic     | 38.25 | 3.26 | 0.669 | Decrease  | Houghton et al. 2014                          |
| <i>Rutilus rutilus</i>          | Actinopterygii | adult    | aquatic     | 31.58 | 0.17 | 0.026 | No effect | Cocking 1956                                  |
| <i>Salmo salar</i>              | Actinopterygii | juvenile | aquatic     | 37.49 | 2.03 | 0.883 | Decrease  | Elliott & Elliott 1995                        |
| <i>Salmo trutta</i>             | Actinopterygii | juvenile | aquatic     | 34.54 | 1.90 | 0.665 | Decrease  | Elliott & Elliott 1995; Galbreath et al. 2004 |
| <i>Salvelinus fontinalis</i>    | Actinopterygii | juvenile | aquatic     | 31.07 | 0.75 | 0.944 | Decrease  | Galbreath et al. 2004                         |
| <i>Solenopsis invicta</i>       | Insecta        | adult    | terrestrial | 62.57 | 8.66 | 0.996 | Decrease  | Bentley et al. 2016                           |
| <i>Tenebrio molitor</i>         | Insecta        | adult    | terrestrial | 42.54 | 0.19 | 0.031 | Mixed     | Allen et al. 2012                             |
| <i>Thaumatotibia leucotreta</i> | Insecta        | adult    | terrestrial | 45.78 | 1.42 | 0.971 | No effect | Terblanche et al. 2017                        |
| <i>Thaumatotibia leucotreta</i> | Insecta        | larvae   | terrestrial | 64.87 | 8.86 | 0.908 | Decrease  | Terblanche et al. 2017                        |
| <i>Xenylla humicola</i>         | Collembola     | adult    | terrestrial | 50.62 | 4.32 | 0.981 | Decrease  | Allen et al. 2016                             |

$CT_{max}$  - intercept of the curve

z - slope of the curve

$r^2$  - Variance explained by the linear semi-logarithmic model (na = have only two rates of temperature change, variance not calculated)

Response - Change in heat tolerance as time of exposure increases

**Table S2.** Cold Tolerance - Thermal death time parameters according to Rezende *et al.* 2014

| Species                         | Class        | Life stage  | Habitat     | $CT_{min}$ | $z'$   | $r^2$ | Response  | Reference                             |
|---------------------------------|--------------|-------------|-------------|------------|--------|-------|-----------|---------------------------------------|
| <i>Ceratitidis capitata</i>     | Insecta      | adult       | terrestrial | 8.39       | 1.15   | 0.995 | Increase  | Nyamunkondiwa & Terblanche 2010       |
| <i>Ceratitidis rosa</i>         | Insecta      | adult       | terrestrial | 8.06       | 0.93   | 0.974 | Increase  | Nyamunkondiwa & Terblanche 2010       |
| <i>Cryptolestes ferrugineus</i> | Insecta      | adult       | terrestrial | 57.45      | 12.36  | na    | Increase  | Jian et al. 2015                      |
| <i>Cydia pomonella</i>          | Insecta      | adult       | terrestrial | 2.44       | 0.70   | 1.000 | No effect | Chidawanyika & Terblanche 2011        |
| <i>Cyrtobagous salviniae</i>    | Insecta      | adult       | aquatic     | 3.17       | 3.60   | 0.785 | Decrease  | Allen et al. 2012                     |
| <i>Deuteraphorura one</i>       | Collembola   | adult       | terrestrial | -2.83      | 0.27   | 0.084 | No effect | Allen et al. 2016                     |
| <i>Deuteraphorura two</i>       | Collembola   | adult       | terrestrial | -2.29      | 0.92   | 0.956 | Decrease  | Allen et al. 2016                     |
| <i>Drosophila melanogaster</i>  | Insecta      | adult       | terrestrial | 7.58       | 0.56   | 0.754 | Increase  | Chown et al. 2009                     |
| <i>Folsomia candida</i>         | Collembola   | adult       | terrestrial | -4.87      | 1.45   | 0.421 | Decrease  | Allen et al. 2016                     |
| <i>Glossina pallidipes</i>      | Insecta      | adult       | terrestrial | -232.51    | 143.52 | 0.837 | Decrease  | Terblanche et al. 2007, 2008          |
| <i>Hypogastrura assimilis</i>   | Collembola   | adult       | terrestrial | 0.79       | 1.31   | 0.993 | Increase  | Allen et al. 2016                     |
| <i>Hypogastrura viatica</i>     | Collembola   | adult       | terrestrial | -0.90      | 2.46   | 0.912 | Increase  | Allen et al. 2016                     |
| <i>Linepithema humile</i>       | Insecta      | adult       | terrestrial | -2.34      | 0.99   | 0.943 | Decrease  | Jumbam et al. 2008; Chown et al. 2009 |
| <i>Litopenaeus vancouveri</i>   | Malacostraca | post larvae | aquatic     | 9.61       | 0.23   | na    | No effect | Kumlu et al. 2010                     |
| <i>Locusta migratoria</i>       | Insecta      | adult       | terrestrial | -0.25      | 0.10   | 0.009 | Mixed     | Findsen et al. 2014                   |
| <i>Nylanderia fulva</i>         | Insecta      | adult       | terrestrial | 6.76       | 0.22   | 0.289 | No effect | Bentley et al. 2016                   |
| <i>Penaeus semisulcatus</i>     | Malacostraca | juvenile    | aquatic     | -3.79      | 4.03   | 0.973 | Decrease  | Kir & Kumlu 2008                      |
| <i>Sitobion avenae</i>          | Insecta      | adult       | terrestrial | 4.34       | 2.69   | 0.933 | Increase  | Powell and Bale 2006                  |
| <i>Solenopsis invicta</i>       | Insecta      | adult       | terrestrial | 2.91       | 0.56   | 0.814 | No effect | Bentley et al. 2016                   |
| <i>Tenebrio molitor</i>         | Insecta      | adult       | terrestrial | 9.40       | 1.85   | 0.858 | Increase  | Allen et al. 2012                     |
| <i>Thaumatotibia leucotreta</i> | Insecta      | adult       | terrestrial | 7.95       | 2.49   | 0.944 | Increase  | Terblanche et al. 2017                |
| <i>Thaumatotibia leucotreta</i> | Insecta      | larvae      | terrestrial | -11.86     | 11.30  | 0.694 | Decrease  | Terblanche et al. 2017                |
| <i>Tribolium castaneum</i>      | Insecta      | adult       | terrestrial | 6.00       | 0.00   | na    | No effect | Jian et al. 2015                      |
| <i>Xenylla humicola</i>         | Collembola   | adult       | terrestrial | -7.30      | 1.13   | 0.380 | Increase  | Allen et al. 2016                     |

$CT_{min}$  - intercept of the curve

$z'$  - slope of the curve

$r^2$  - Variance explained by the linear semi-logarithmic model (na = have only two rates of temperature change, variance not calculated)

Response - Change in cold tolerance as time of exposure increases

**Table S3.** *CTmax* models - Best models and the variance accounting for the statistical effects of the failure rate model according to Kingsolver & Umbanhowar, 2018

| Species                          | Class          | Life stage | Habitat     | Best Failure Rate Model                          | Variance | Response  | Reference                                     | Comments                                                                   |
|----------------------------------|----------------|------------|-------------|--------------------------------------------------|----------|-----------|-----------------------------------------------|----------------------------------------------------------------------------|
| <i>Acanthemblemaria hancocki</i> | Actinopterygii | adult      | aquatic     | Zero Exponential Threshold                       | 0.436    | Mixed     | Mora & Maya 2006                              |                                                                            |
| <i>Atta sexdens rubropulosa</i>  | Insecta        | adult      | terrestrial | Exponential/Zero Exponential                     | 0.460    | Increase  | Ribeiro et al. 2012                           |                                                                            |
| <i>Bathygobius soporator</i>     | Actinopterygii | adult      | aquatic     | Zero Power Threshold                             | 0.053    | No effect | Vinagre et al. 2014                           | Other good model fit: Exponential Threshold and Zero Exponential Threshold |
| <i>Ceratitis capitata</i>        | Insecta        | adult      | terrestrial | Converse trend                                   | na       | Decrease  | Nyamunkondiwa & Terblanche 2010               |                                                                            |
| <i>Ceratitis rosa</i>            | Insecta        | adult      | terrestrial | Converse trend                                   | na       | Decrease  | Nyamunkondiwa & Terblanche 2010               |                                                                            |
| <i>Clupea harengus</i>           | Actinopterygii | larvae     | aquatic     | Exponential/Zero Exponential                     | 0.312    | Increase  | Moyano et al. 2017                            |                                                                            |
| <i>Cydia pomonella</i>           | Insecta        | adult      | terrestrial | Converse trend                                   | na       | Decrease  | Chidawanyika & Terblanche 2011                |                                                                            |
| <i>Cyrtobagous salviniae</i>     | Insecta        | adult      | aquatic     | Exponential/Zero Exponential                     | 0.893    | Increase  | Allen et al. 2012                             |                                                                            |
| <i>Deuteraphorura one</i>        | Collembola     | adult      | terrestrial | Exponential/Zero Exponential                     | 0.869    | Increase  | Allen et al. 2016                             |                                                                            |
| <i>Deuteraphorura two</i>        | Collembola     | adult      | terrestrial | Exponential/Zero Exponential                     | 0.952    | Increase  | Allen et al. 2016                             |                                                                            |
| <i>Dicentrarchus labrax</i>      | Actinopterygii | larvae     | aquatic     | Exponential/Zero Exponential                     | 0.125    | No effect | Moyano et al. 2017                            |                                                                            |
| <i>Drosophila melanogaster</i>   | Insecta        | adult      | terrestrial | Zero Power Threshold                             | 0.986    | Increase  | Chown et al. 2009                             | Other good model fit: Exponential Threshold and Zero Exponential Threshold |
| <i>Drosophila subobscura</i>     | Insecta        | adult      | terrestrial | Only two rates of temp. change                   | na       | Increase  | Castañeda et al 2015                          |                                                                            |
| <i>Eurypanopeus abbreviatus</i>  | Malacostraca   | adult      | aquatic     | Converse trend                                   | na       | Decrease  | Vinagre et al. 2014                           |                                                                            |
| <i>Exosphaeroma antikraussi</i>  | Malacostraca   | adult      | aquatic     | Only two rates of temp. change                   | na       | No effect | Faulkner et al. 2014                          |                                                                            |
| <i>Exosphaeroma gigas</i>        | Malacostraca   | adult      | aquatic     | Exponential/Zero Exponential                     | 0.745    | Increase  | Faulkner et al. 2014                          |                                                                            |
| <i>Exosphaeroma laeviusculum</i> | Malacostraca   | adult      | aquatic     | Exponential/Zero Exponential                     | 0.744    | Increase  | Faulkner et al. 2014                          |                                                                            |
| <i>Folsomia candida</i>          | Collembola     | adult      | terrestrial | Exponential/Zero Exponential                     | 0.869    | Increase  | Allen et al. 2016                             |                                                                            |
| <i>Glossina pallidipes</i>       | Insecta        | adult      | terrestrial | Exponential Threshold                            | 0.864    | Increase  | Terblanche et al. 2007, 2008                  |                                                                            |
| <i>Hippolyte obliquimanus</i>    | Malacostraca   | adult      | aquatic     | Zero Power Threshold                             | 0.981    | No effect | Vinagre et al. 2014                           | Other good model fit: Exponential Threshold and Zero Exponential Threshold |
| <i>Hyale grandicornis</i>        | Malacostraca   | adult      | aquatic     | Zero Exponential                                 | 0.952    | Increase  | Faulkner et al. 2014                          |                                                                            |
| <i>Hyale hirtipalma</i>          | Malacostraca   | adult      | aquatic     | Exponential/Zero Exponential                     | 0.893    | Increase  | Faulkner et al. 2014                          |                                                                            |
| <i>Hypogastrura assimilis</i>    | Collembola     | adult      | terrestrial | Exponential/Zero Exponential                     | 0.949    | Increase  | Allen et al. 2016                             |                                                                            |
| <i>Hypogastrura viatica</i>      | Collembola     | adult      | terrestrial | Exponential/Zero Exponential                     | 0.994    | Increase  | Allen et al. 2016                             |                                                                            |
| <i>Lepomis gibbosus</i>          | Actinopterygii | juvenile   | aquatic     | Exponential/Zero Exponential                     | 0.234    | Increase  | Becker & Genoway 1979                         |                                                                            |
| <i>Linepithema humile</i>        | Insecta        | adult      | terrestrial | Exponential/Zero Exponential                     | 0.985    | Increase  | Jumbam et al. 2008; Chown et al. 2009         |                                                                            |
| <i>Menippe nodifrons</i>         | Malacostraca   | adult      | aquatic     | Converse trend                                   | na       | Decrease  | Vinagre et al. 2014                           |                                                                            |
| <i>Nylanderia fulva</i>          | Insecta        | adult      | terrestrial | Exponential/Zero Exponential                     | 0.999    | Increase  | Bentley et al. 2016                           |                                                                            |
| <i>Oncorhynchus kitsutch</i>     | Actinopterygii | juvenile   | aquatic     | Exponential/Zero Exponential                     | 0.942    | Increase  | Becker & Genoway 1979                         |                                                                            |
| <i>Oncorhynchus mykiss</i>       | Actinopterygii | juvenile   | aquatic     | Exponential/Zero Exponential                     | 0.762    | No effect | Galbreath et al. 2004                         |                                                                            |
| <i>Palaemon northropi</i>        | Malacostraca   | adult      | aquatic     | Exponential Threshold/Zero Exponential Threshold | 0.381    | Increase  | Vinagre et al. 2014                           | Other good model fit: Zero Power Threshold                                 |
| <i>Parablennius narmoreus</i>    | Actinopterygii | adult      | aquatic     | Zero Power Threshold                             | 0.997    | Increase  | Vinagre et al. 2014                           | Other good model fit: Exponential Threshold and Zero Exponential Threshold |
| <i>Pycnopysche guttifer</i>      | Insecta        | larvae     | aquatic     | Exponential/Zero Exponential                     | 0.723    | Increase  | Houghton et al. 2014                          |                                                                            |
| <i>Rutilus rutilus</i>           | Actinopterygii | adult      | aquatic     | Exponential/Zero Exponential                     | 0.000    | No effect | Cocking 1956                                  |                                                                            |
| <i>Salmo salar</i>               | Actinopterygii | juvenile   | aquatic     | Exponential/Zero Exponential                     | 0.628    | Increase  | Elliott & Elliott 1995                        |                                                                            |
| <i>Salmo trutta</i>              | Actinopterygii | juvenile   | aquatic     | Exponential/Zero Exponential                     | 0.414    | Increase  | Elliott & Elliott 1995; Galbreath et al. 2004 |                                                                            |
| <i>Salvelinus fontinalis</i>     | Actinopterygii | juvenile   | aquatic     | Exponential/Zero Exponential                     | 0.626    | Increase  | Galbreath et al. 2004                         |                                                                            |
| <i>Solenopsis invicta</i>        | Insecta        | adult      | terrestrial | Exponential Threshold                            | 0.999    | Increase  | Bentley et al. 2016                           | Other good model fit: Zero Exponential Threshold                           |
| <i>Tenebrio molitor</i>          | Insecta        | adult      | terrestrial | Exponential/Zero Exponential                     | 0.023    | Mixed     | Allen et al. 2012                             |                                                                            |
| <i>Thaumatotibia leucotreta</i>  | Insecta        | adult      | terrestrial | Zero Power Threshold                             | 0.974    | No effect | Terblanche et al. 2017                        | Other good model fit: Exponential Threshold and Zero Exponential Threshold |

|                                 |            |        |             |                              |       |          |                        |                                                                      |
|---------------------------------|------------|--------|-------------|------------------------------|-------|----------|------------------------|----------------------------------------------------------------------|
| <i>Thaumatotibia leucotreta</i> | Insecta    | larvae | terrestrial | Zero Exponential Threshold   | 0.938 | Increase | Terblanche et al. 2017 | Other good model fit: Exponential Threshold and Zero Power Threshold |
| <i>Xenylla humicola</i>         | Collembola | adult  | terrestrial | Exponential/Zero Exponential | 0.983 | Increase | Allen et al. 2016      |                                                                      |

Best Failure Rate Model - model with the lowest AICc (na = converse trend from the one expected by the model OR have only two rates of temperature change, variance not calculated)

Variance - Variance accounting for the statistical effects of the failure rate model (na = only two rates of temperature change, variance not calculated)

Response - Change in heat tolerance as ramping rate increases

**Table S4.** *CTmin* models - Best models and the variance accounting for the statistical effects of the failure rate model according to Kingsolver & Umbanhowar, 2018

| Species                         | Class        | Life stage  | Habitat     | Best Failure Rate Model                          | Variance | Response  | Reference                             | Comments                                                                   |
|---------------------------------|--------------|-------------|-------------|--------------------------------------------------|----------|-----------|---------------------------------------|----------------------------------------------------------------------------|
| <i>Ceratitis capitata</i>       | Insecta      | adult       | terrestrial | Converse trend                                   | na       | Decrease  | Nyamunkondiwa & Terblanche 2010       |                                                                            |
| <i>Ceratitis rosa</i>           | Insecta      | adult       | terrestrial | Converse trend                                   | na       | Decrease  | Nyamunkondiwa & Terblanche 2010       |                                                                            |
| <i>Cryptolestes ferrugineus</i> | Insecta      | adult       | terrestrial | Only two rates of temp. change                   | na       | Decrease  | Jian et al. 2015                      |                                                                            |
| <i>Cydia pomonella</i>          | Insecta      | adult       | terrestrial | Zero Power Threshold                             | 0.999    | No effect | Chidawanyika & Terblanche 2011        | Other good model fit: Exponential Threshold and Zero Exponential Threshold |
| <i>Cyrtobagous salviniae</i>    | Insecta      | adult       | aquatic     | Exponential/Zero Exponential                     | 0.823    | Increase  | Allen et al. 2012                     |                                                                            |
| <i>Deuteraphorura one</i>       | Collembola   | adult       | terrestrial | Exponential Threshold/Zero Exponential Threshold | 0.096    | No effect | Allen et al. 2016                     | Other good model fit: Zero Power Threshold                                 |
| <i>Deuteraphorura two</i>       | Collembola   | adult       | terrestrial | Zero Power Threshold                             | 0.958    | Increase  | Allen et al. 2016                     | Other good model fit: Exponential Threshold and Zero Exponential Threshold |
| <i>Drosophila melanogaster</i>  | Insecta      | adult       | terrestrial | Converse trend                                   | na       | Decrease  | Chown et al. 2009                     |                                                                            |
| <i>Folsomia candida</i>         | Collembola   | adult       | terrestrial | Zero Power Threshold                             | 0.469    | Increase  | Allen et al. 2016                     | Other good model fit: Exponential Threshold and Zero Exponential Threshold |
| <i>Glossina pallidipes</i>      | Insecta      | adult       | terrestrial | Exponential Threshold                            | 0.996    | Increase  | Terblanche et al. 2007, 2008          |                                                                            |
| <i>Hypogastrura assimilis</i>   | Collembola   | adult       | terrestrial | Converse trend                                   | na       | Decrease  | Allen et al. 2016                     |                                                                            |
| <i>Hypogastrura viatica</i>     | Collembola   | adult       | terrestrial | Converse trend                                   | na       | Decrease  | Allen et al. 2016                     |                                                                            |
| <i>Linepithema humile</i>       | Insecta      | adult       | terrestrial | Exponential/Zero Exponential                     | 0.945    | Increase  | Jumbam et al. 2008; Chown et al. 2009 |                                                                            |
| <i>Litopenaeus vannamei</i>     | Malacostraca | post larvae | aquatic     | Only two rates of temp. change                   | na       | No effect | Kumlu et al. 2010                     |                                                                            |
| <i>Locusta migratoria</i>       | Insecta      | adult       | terrestrial | Exponential/Zero Exponential                     | 0.014    | Mixed     | Findsen et al. 2014                   |                                                                            |
| <i>Nylanderia fulva</i>         | Insecta      | adult       | terrestrial | Exponential Threshold/Zero Exponential Threshold | 0.296    | No effect | Bentley et al. 2016                   |                                                                            |
| <i>Panaeus semisulcatus</i>     | Malacostraca | juvenile    | aquatic     | Zero Power Threshold                             | 0.871    | Increase  | Kir & Kumlu 2008                      | Other good model fit: Exponential Threshold and Zero Exponential Threshold |
| <i>Sitobion avenae</i>          | Insecta      | adult       | terrestrial | Converse trend                                   | na       | Decrease  | Powell and Bale 2006                  |                                                                            |
| <i>Solenopsis invicta</i>       | Insecta      | adult       | terrestrial | Exponential Threshold                            | 0.818    | No effect | Bentley et al. 2016                   | Other good model fit: Zero Power Threshold                                 |
| <i>Tenebrio molitor</i>         | Insecta      | adult       | terrestrial | Converse trend                                   | na       | Decrease  | Allen et al. 2012                     |                                                                            |
| <i>Thaumatotibia leucotreta</i> | Insecta      | adult       | terrestrial | Converse trend                                   | na       | Increase  | Terblanche et al. 2017                |                                                                            |
| <i>Thaumatotibia leucotreta</i> | Insecta      | larvae      | terrestrial | Exponential Threshold                            | 0.917    | Decrease  | Terblanche et al. 2017                | Other good model fit: Zero Exponential Threshold and Zero Power Threshold  |
| <i>Tribolium castaneum</i>      | Insecta      | adult       | terrestrial | Only two rates of temp. change                   | na       | No effect | Jian et al. 2015                      |                                                                            |
| <i>Xenylla humicola</i>         | Collembola   | adult       | terrestrial | Zero Power Threshold                             | 0.424    | Increase  | Allen et al. 2016                     | Other good model fit: Exponential Threshold and Zero Exponential Threshold |

Best Failure Rate Model - model with the lowest AICc (na = converse trend from the one expected by the model OR have only two rates of temperature change, variance not calculated)

Variance - Variance accounting for the statistical effects of the failure rate model (na = only two rates of temperature change, variance not calculated)

Response - Change in cold tolerance as ramping rate increases

**Table S5**

Outcome of Phylogenetic Generalised Least Squares (PGLS) analyses showing change in the sensitivity to temperature change ( $z$  and  $z'$ ) with the type of response observed to the increased time of exposure to high ( $z$ ) and low ( $z'$ ) stressful temperatures, habitat and climate.

| Response ( $z$ )                                                        | Estimate | s.e.  | t      | P                 |
|-------------------------------------------------------------------------|----------|-------|--------|-------------------|
| Decrease                                                                | 3.369    | 0.725 | 4.654  | <b>&lt;0.0001</b> |
| Increase                                                                | -3.038   | 0.971 | -3.128 | <b>0.003</b>      |
| Mixed                                                                   | -3.013   | 1.403 | -2.148 | <b>0.038</b>      |
| No Effect                                                               | -2.435   | 0.900 | -2.706 | <b>0.010</b>      |
| $F_{(3,36)} = 5.905, p = 0.002194, R^2 = 0.33, \text{ML}\lambda = 0.26$ |          |       |        |                   |
| Response ( $z'$ )                                                       | Estimate | s.e.  | t      | P                 |
| Decrease                                                                | 2.198    | 0.407 | 5.398  | <b>&lt;0.0001</b> |
| Increase                                                                | -0.688   | 0.519 | -1.326 | 0.204             |
| Mixed                                                                   | -2.098   | 0.997 | -2.104 | 0.052             |
| No Effect                                                               | -1.868   | 0.551 | -3.389 | <b>0.004</b>      |
| $F_{(3,16)} = 4.60, p = 0.01667, R^2 = 0.46, \text{ML}\lambda = 0.00$   |          |       |        |                   |
| Habitat ( $z$ )                                                         | Estimate | s.e.  | t      | P                 |
| Aquatic                                                                 | 1.913    | 0.577 | 3.315  | <b>0.002</b>      |
| Terrestrial                                                             | 1.671    | 0.849 | 1.968  | 0.056             |
| $F_{(1,38)} = 3.873, p = 0.05639, R^2 = 0.09, \text{ML}\lambda = 0.05$  |          |       |        |                   |
| Habitat ( $z'$ )                                                        | Estimate | s.e.  | t      | P                 |
| Aquatic                                                                 | 2.620    | 0.580 | 4.520  | <b>0.0003</b>     |
| Terrestrial                                                             | -1.603   | 0.629 | -2.550 | <b>0.020</b>      |
| $F_{(1,18)} = 6.5, p = 0.02012, R^2 = 0.22, \text{ML}\lambda = 0.00$    |          |       |        |                   |
| Climate ( $z$ )                                                         | Estimate | s.e.  | t      | P                 |
| Polar                                                                   | 2.896    | 1.383 | 2.094  | <b>0.043</b>      |



|              |        |       |        |       |
|--------------|--------|-------|--------|-------|
| Sub-tropical | -0.357 | 1.889 | -0.189 | 0.851 |
| Temperate    | -0.645 | 1.124 | -0.574 | 0.569 |
| Tropical     | -0.367 | 1.253 | -0.293 | 0.771 |

$F_{(3,36)} = 0.118, p = 0.949, R^2 = 0.0098, \text{ML}\lambda = 0.40$

| Climate (z') | Estimate | s.e.  | t      | P            |
|--------------|----------|-------|--------|--------------|
| Polar        | 1.795    | 0.839 | 2.140  | <b>0.048</b> |
| Sub-tropical | -0.680   | 1.186 | -0.573 | 0.574        |
| Temperate    | -0.470   | 0.897 | -0.524 | 0.607        |
| Tropical     | -1.405   | 1.186 | -1.185 | 0.253        |

$F_{(3,16)} = 0.518, p = 0.6757, R^2 = 0.0886, \text{ML}\lambda = 0.00$

**Table S6**

Result of GLM testing the effects of rate of time to failure, body length and interaction on  $CT_{max}$  of juvenile and adult fish:  $CT_{max} \sim \log_{10}(\text{FailTime}) * \log_{10}(\text{Body Length})$

| $CT_{max}$                                                          | Estimate | s.e.   | t      | P            |
|---------------------------------------------------------------------|----------|--------|--------|--------------|
| $CT_{max}$ (Intercept)                                              | 65.019   | 10.219 | 6.362  | <0.0001      |
| $\log_{10}(\text{Time to failure})$                                 | -6.488   | 3.413  | -1.901 | 0.063        |
| $\log_{10}(\text{Body Length})$                                     | -14.604  | 5.360  | -2.724 | <b>0.009</b> |
| $\log_{10}(\text{Time to failure}) * \log_{10}(\text{Body Length})$ | 2.451    | 1.763  | 1.390  | 0.170        |

**Table S7**

Result of GLM testing the effects of rate of time to failure, body length and interaction on  $CT_{max}$  of crustaceans, insects, and springtails combined:  $CT_{max} \sim \log_{10}(\text{FailTime}) * \log_{10}(\text{Body Length})$

| $CT_{max}$                                                          | Estimate | s.e.  | t      | P             |
|---------------------------------------------------------------------|----------|-------|--------|---------------|
| $CT_{max}$ (Intercept)                                              | 60.086   | 4.825 | 12.452 | <0.0001       |
| $\log_{10}(\text{Time to failure})$                                 | -8.355   | 2.219 | -3.766 | <b>0.0003</b> |
| $\log_{10}(\text{Body Length})$                                     | -10.331  | 4.669 | -2.213 | <b>0.029</b>  |
| $\log_{10}(\text{Time to failure}) * \log_{10}(\text{Body Length})$ | 2.916    | 2.083 | 1.400  | 0.165         |

GLM models of time and body size interaction were run separately for fish and all the other taxa to avoid sampling bias in our analysis, since fish was the only taxonomic group in our dataset with body length above 31mm (Figure S3).  $CT_{max}$  variation among fish species was not a consequence of interaction between time and body length, even after excluding fish larvae from the dataset (Table S6). Likewise,  $CT_{max}$  variation among species from other taxonomic groups combined was not a consequence of interaction between time and body length (Table S7).

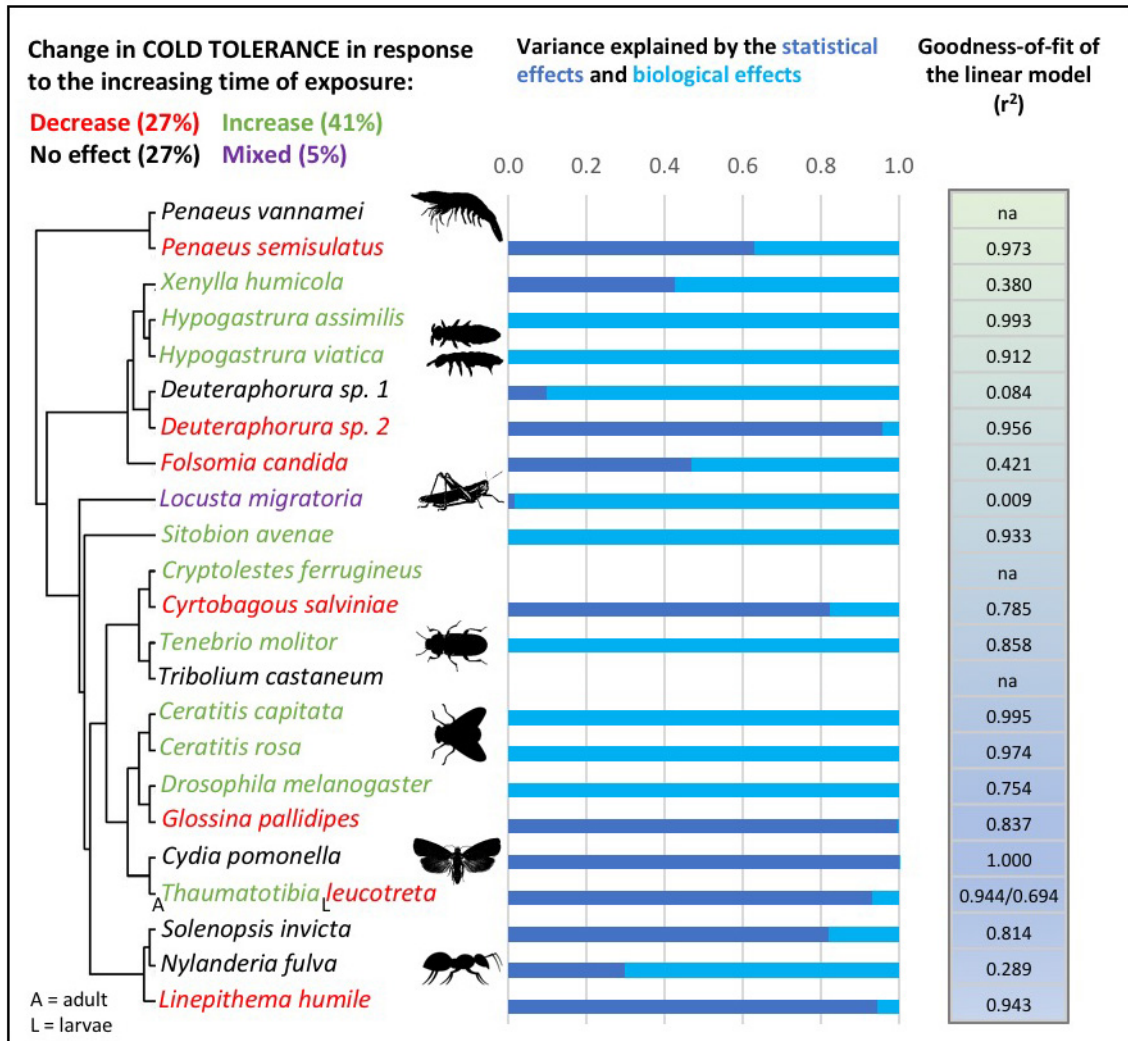

**Figure S1.** Phylogeny of 41 species of ectotherms used in the  $CT_{max}$  analysis and their response patterns describing the change in heat tolerance with the increasing exposure time (i.e. slower ramping rates). Variance explained by the statistical (dark blue) and biological (light blue) effects using a failure rate model [1] and goodness-of-fit of the thermal landscape model [2].

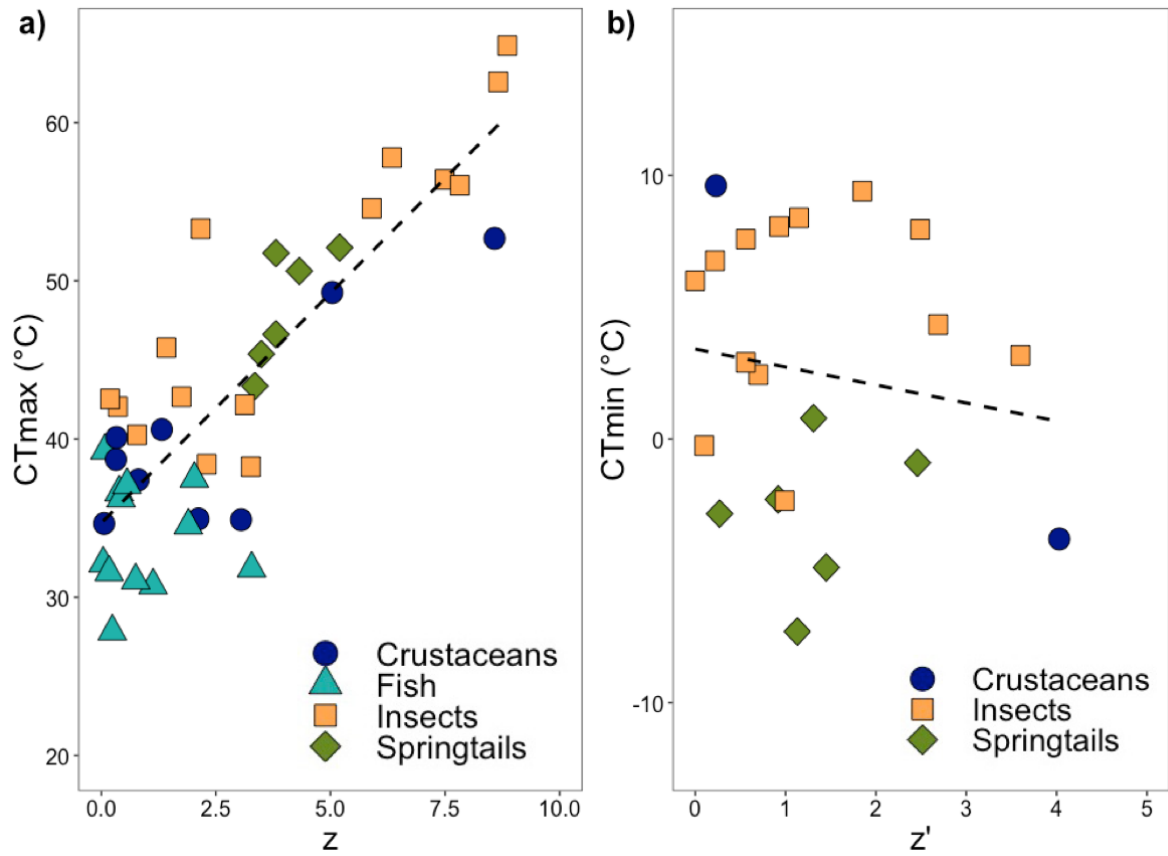

**Figure S2.** a) The association between parameters  $CT_{max}$  and  $z$  for 41 species of ectotherms  
 b) The association between parameters  $CT_{min}$  and  $z'$  for 21 species of ectotherms.  $CT_{max}$  ( $CT_{min}$ ) and  $z$  ( $z'$ ) correspond to intercept and slope of log-linear model of CTLs against a logarithm of time for each species [2].

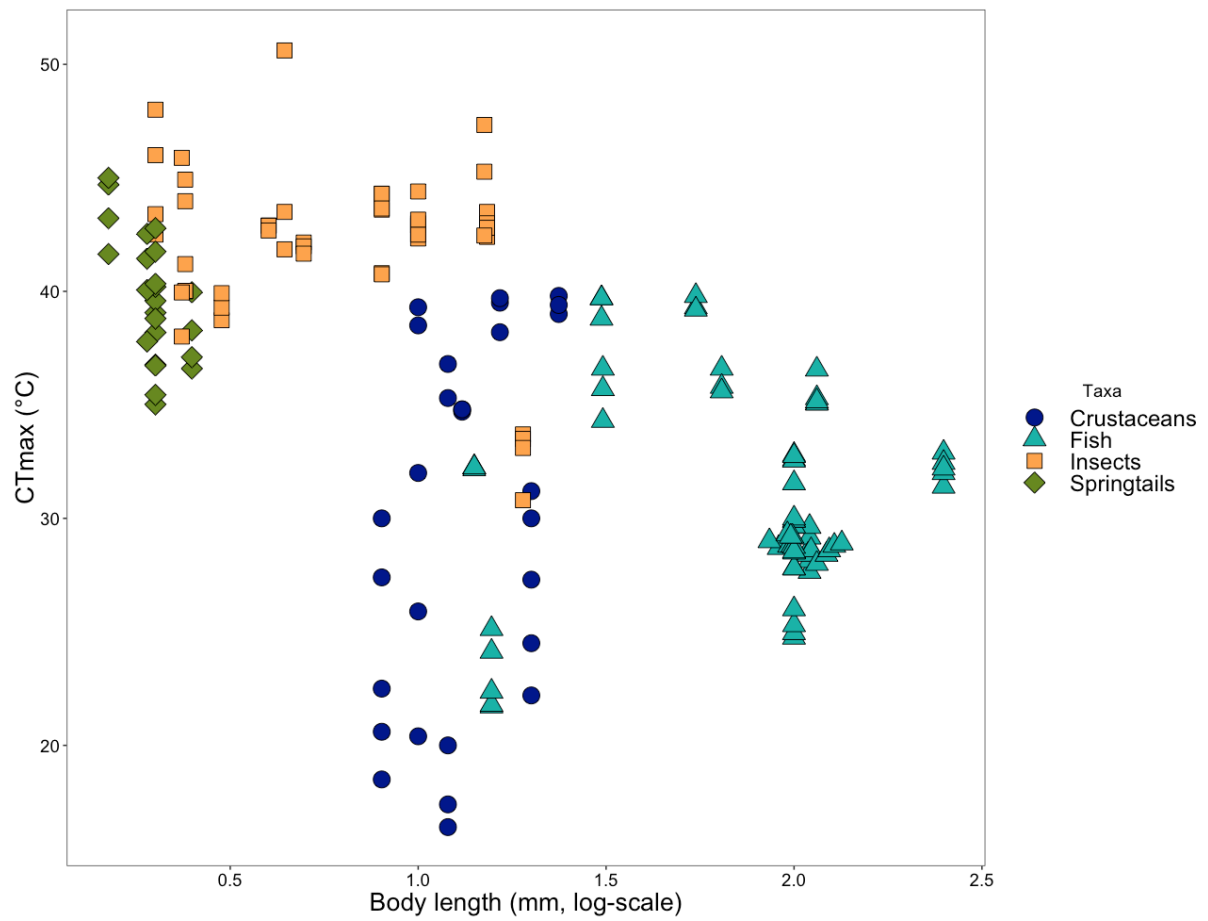

**Figure S3.** Relationship between body length (mm) and  $CT_{max}$  of 38 species of ectotherms

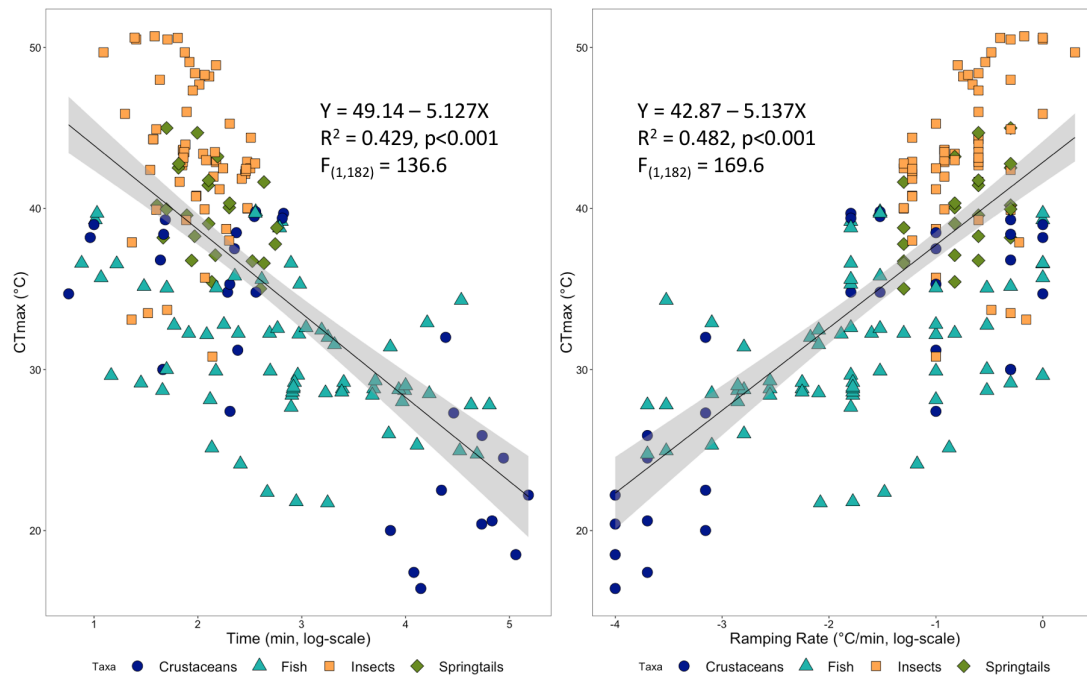

**Figure S4.** Left panel shows the overall time-temperature relationship. Right panel shows the overall rate-temperature relationship. The outcomes of the study are similar.

## References

1. Kingsolver JG, Umbanhowar J. 2018 The analysis and interpretation of critical temperatures. *J. Exp. Biol.* **221** (doi:10.1242/jeb.167858)
2. Rezende EL, Castañeda LE, Santos M. 2014 Tolerance landscapes in thermal ecology. *Funct. Ecol.* **28**, 799–809. (doi:10.1111/1365-2435.12268)
